# Supplementary figures and images for: Zonulin Antagonist, Larazotide (AT1001), As an Adjuvant Treatment for Multisystem Inflammatory Syndrome in Children: A Case Series
Source: PubMed Central journal article supplement — Crit Care Explor. 2022 Feb 18;4(2):e0641. doi: 10.1097/CCE.0000000000000641 (PMC8860335; doi:10.1097/cce.0000000000000641), 2022-02-18

### Patient 1

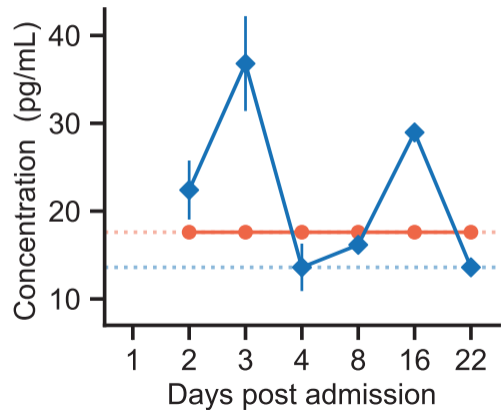

### Patient 2

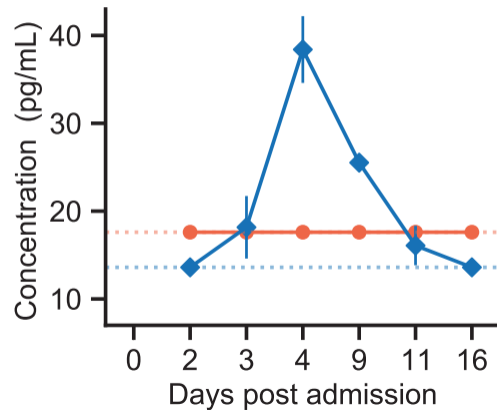

### Patient 3

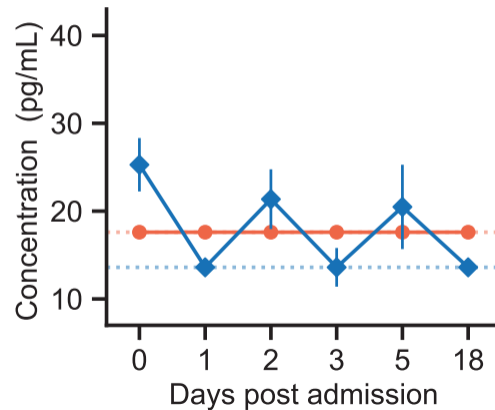

### Patient 4

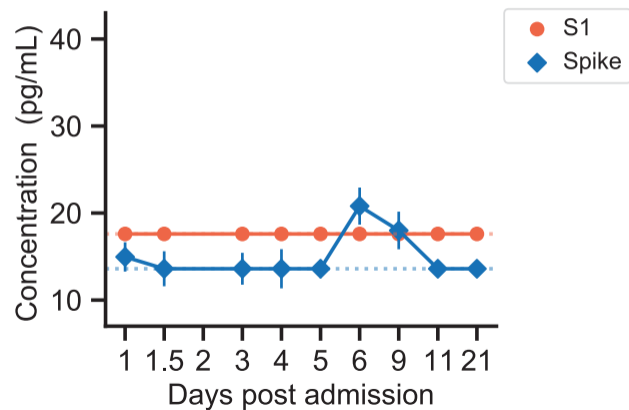

Supplement: cc9-4-e0641-s001.pdf [file cc9-4-e0641-s001.pdf]
